# Supplementary material for: Abnormal expression of mRNA, microRNA alteration and aberrant DNA methylation patterns in rectal adenocarcinoma
Source: PLoS One. 2017 Mar 28;12(3):e0174461. doi: 10.1371/journal.pone.0174461 (PMC5370119; doi:10.1371/journal.pone.0174461)
Supplement: S2 Table — (XLSX) [file pone.0174461.s004.xlsx]

## Sheet: Table S2
CpG island	Genes	Number of methylation	Number of unmethylation	Delta.beta	FDR	Methylation.status
chr10:3823789-3824017	KLF6	0	3	0.40888	0.00710428	Decreased Methylation
chr17:81009245-81009999	B3GNTL1	0	3	0.40888	0.0381682	Decreased Methylation
chr20:49347365-49348659		0	3	0.40888	0.0138388	Decreased Methylation
chr2:233925091-233925318	INPP5D	0	3	0.40888	0.00443783	Decreased Methylation
chr6:31830299-31830948	NEU1;SLC44A4	0	4	0.40888	0.000318707	Decreased Methylation
chr8:49835987-49836231		0	2	0.40888	0.0168039	Decreased Methylation
chr10:102279162-102279730	SEC31B	2	0	0.40888	0.0351837	Increased Methylation
chr10:50822350-50822666	CHAT	2	0	0.40888	0.0285011	Increased Methylation
chr11:122847494-122848608		2	0	0.40888	0.00383503	Increased Methylation
chr1:120835961-120839391	FAM72B	2	0	0.40888	0.0496394	Increased Methylation
chr11:31848487-31848776		2	0	0.40888	0.0177055	Increased Methylation
chr11:44332314-44332757	ALX4	2	0	0.40888	0.0432239	Increased Methylation
chr11:64739010-64739750		2	0	0.40888	0.0130223	Increased Methylation
chr12:114838312-114838889	TBX5	2	0	0.40888	0.00863176	Increased Methylation
chr12:122016170-122017693	KDM2B	2	0	0.40888	0.0134169	Increased Methylation
chr1:221050448-221050864		2	0	0.40888	0.00483168	Increased Methylation
chr13:108518334-108518633	FAM155A	2	0	0.40888	0.0161063	Increased Methylation
chr13:112717125-112717421		2	0	0.40888	0.0220334	Increased Methylation
chr13:38443682-38444228	TRPC4	2	0	0.40888	0.00432541	Increased Methylation
chr14:37135513-37136348	PAX9	2	0	0.40888	0.0405174	Increased Methylation
chr14:38052645-38054166		2	0	0.40888	0.0162333	Increased Methylation
chr15:53080458-53083699	ONECUT1	2	0	0.40888	0.00906498	Increased Methylation
chr15:65116013-65116567	PIF1	2	0	0.40888	0.00637906	Increased Methylation
chr15:79381804-79384209	RASGRF1	2	0	0.40888	0.048834	Increased Methylation
chr1:70032967-70034495		2	0	0.40888	0.00465101	Increased Methylation
chr17:37380953-37382363	STAC2	2	0	0.40888	0.0141632	Increased Methylation
chr18:76732970-76734765		2	0	0.40888	0.0242739	Increased Methylation
chr19:41073494-41074151	SPTBN4	2	0	0.40888	0.021037	Increased Methylation
chr19:51830064-51831145	IGLON5	2	0	0.40888	0.0376889	Increased Methylation
chr20:57089460-57090237	APCDD1L	2	0	0.40888	0.0231266	Increased Methylation
chr20:58179808-58180787	PHACTR3	2	0	0.40888	0.00813117	Increased Methylation
chr2:101033606-101034296	CHST10	2	0	0.40888	0.045007	Increased Methylation
chr2:56150340-56151180	EFEMP1	2	0	0.40888	0.0196001	Increased Methylation
chr2:63274475-63279430	LOC100132215	2	0	0.40888	0.0430308	Increased Methylation
chr2:66808568-66809404		2	0	0.40888	0.0162333	Increased Methylation
chr2:87015974-87018182	CD8A	2	0	0.40888	0.0396802	Increased Methylation
chr3:147077115-147077672		2	0	0.40888	0.0439843	Increased Methylation
chr3:27771638-27771942		2	0	0.40888	0.0389162	Increased Methylation
chr4:113431825-113432596		2	0	0.40888	0.0235694	Increased Methylation
chr4:174448333-174448845		2	0	0.40888	0.0250006	Increased Methylation
chr5:158532294-158532502		2	0	0.40888	0.0140754	Increased Methylation
chr5:178016558-178017670	COL23A1	2	0	0.40888	0.0446502	Increased Methylation
chr5:3594467-3603054	IRX1	2	0	0.40888	0.0367678	Increased Methylation
chr5:43396897-43397364	CCL28	2	0	0.40888	0.0123669	Increased Methylation
chr6:108495654-108495986	NR2E1	2	0	0.40888	0.0415656	Increased Methylation
chr6:142409473-142410112	NMBR	2	0	0.40888	0.046596	Increased Methylation
chr6:30227320-30228255	HLA-L	2	0	0.40888	0.0346596	Increased Methylation
chr8:73163618-73164191		2	0	0.40888	0.0138426	Increased Methylation
chr8:75896528-75897116	CRISPLD1	2	0	0.40888	0.00890591	Increased Methylation
chr9:969529-973276		2	0	0.40888	0.0485756	Increased Methylation
chr9:976162-977828		2	0	0.40888	0.021037	Increased Methylation
chr10:101089010-101090655	CNNM1	3	0	0.40888	0.0059201	Increased Methylation
chr10:102996034-102996646	FLJ41350	3	0	0.40888	0.0107271	Increased Methylation
chr10:108923780-108924805	SORCS1	3	0	0.40888	0.0206837	Increased Methylation
chr10:125650820-125651373	CPXM2	3	0	0.40888	0.00254915	Increased Methylation
chr10:125732220-125732843		3	0	0.40888	0.0100108	Increased Methylation
chr10:22634000-22634862	SPAG6	3	0	0.40888	0.0112333	Increased Methylation
chr10:23480697-23482455	PTF1A	3	0	0.40888	0.00508523	Increased Methylation
chr10:23982382-23982589	KIAA1217	3	0	0.40888	0.00080337	Increased Methylation
chr10:26222921-26224022	MYO3A	3	0	0.40888	0.00936419	Increased Methylation
chr10:83633820-83635729	NRG3	3	0	0.40888	0.0116857	Increased Methylation
chr1:110610265-110613303	ALX3	3	0	0.40888	0.0318639	Increased Methylation
chr11:115529997-115530548		3	0	0.40888	0.000287732	Increased Methylation
chr11:115630398-115631117		3	0	0.40888	0.00504755	Increased Methylation
chr11:18812572-18814079	PTPN5	3	0	0.40888	0.0451953	Increased Methylation
chr1:119543056-119543454		3	0	0.40888	0.00882337	Increased Methylation
chr11:19733936-19735320	LOC100126784;NAV2	3	0	0.40888	0.00409092	Increased Methylation
chr11:20618197-20619920		3	0	0.40888	0.00424272	Increased Methylation
chr11:31825743-31826967	PAX6	3	0	0.40888	0.006112	Increased Methylation
chr11:31827696-31827921	PAX6	3	0	0.40888	0.00982455	Increased Methylation
chr11:32452144-32452708	WT1	3	0	0.40888	0.000362831	Increased Methylation
chr1:13910137-13910868	PDPN	3	0	0.40888	0.0227712	Increased Methylation
chr1:170630456-170630851		3	0	0.40888	0.0101114	Increased Methylation
chr11:71954816-71955659	PHOX2A	3	0	0.40888	0.00289115	Increased Methylation
chr1:200008392-200009047	NR5A2	3	0	0.40888	0.0289556	Increased Methylation
chr1:208084098-208084513	CD34	3	0	0.40888	0.0102874	Increased Methylation
chr1:208132327-208133117		3	0	0.40888	0.0237165	Increased Methylation
chr12:106979429-106981086	RFX4	3	0	0.40888	0.000107882	Increased Methylation
chr12:113013099-113013529		3	0	0.40888	0.0233772	Increased Methylation
chr12:113900750-113906442	LHX5	3	0	0.40888	0.0300175	Increased Methylation
chr12:114845861-114847650	TBX5	3	0	0.40888	0.00374601	Increased Methylation
chr12:114878143-114879155		3	0	0.40888	0.0111905	Increased Methylation
chr12:115104848-115105548		3	0	0.40888	0.036611	Increased Methylation
chr1:217311467-217311773	ESRRG	3	0	0.40888	0.0075158	Increased Methylation
chr12:29935995-29937433	TMTC1	3	0	0.40888	0.00426083	Increased Methylation
chr12:41582155-41582975	PDZRN4	3	0	0.40888	0.029722	Increased Methylation
chr1:242687922-242688682	PLD5	3	0	0.40888	0.0094094	Increased Methylation
chr12:50354839-50356163	AQP5	3	0	0.40888	0.00992299	Increased Methylation
chr12:54393374-54394648	HOXC9	3	0	0.40888	0.00388531	Increased Methylation
chr12:95941906-95942979	USP44	3	0	0.40888	0.0116403	Increased Methylation
chr1:2983925-2987962	PRDM16;FLJ42875	3	0	0.40888	0.0120189	Increased Methylation
chr13:25620937-25621554		3	0	0.40888	0.00957933	Increased Methylation
chr13:36049570-36050159	MIR548F5;MAB21L1;NBEA	3	0	0.40888	0.0226371	Increased Methylation
chr13:53313127-53314045	LECT1	3	0	0.40888	0.0185977	Increased Methylation
chr13:88326600-88326919	SLITRK5	3	0	0.40888	0.0178798	Increased Methylation
chr14:101923575-101925995		3	0	0.40888	0.0305378	Increased Methylation
chr14:29234889-29235908	FOXG1	3	0	0.40888	0.0249878	Increased Methylation
chr14:36986362-36990576	NKX2-1	3	0	0.40888	0.00555536	Increased Methylation
chr14:57260878-57262123		3	0	0.40888	0.000349636	Increased Methylation
chr14:57264638-57265561		3	0	0.40888	0.00969885	Increased Methylation
chr14:57274607-57276840	OTX2	3	0	0.40888	0.0264847	Increased Methylation
chr14:57278709-57279116	OTX2	3	0	0.40888	0.00280576	Increased Methylation
chr14:60973772-60974123		3	0	0.40888	0.0340129	Increased Methylation
chr14:61108954-61109786		3	0	0.40888	0.0101114	Increased Methylation
chr14:77736733-77737772	NGB	3	0	0.40888	0.0134169	Increased Methylation
chr1:49242371-49242810	AGBL4;BEND5	3	0	0.40888	0.000168071	Increased Methylation
chr14:97685059-97685946		3	0	0.40888	0.0139661	Increased Methylation
chr15:101419261-101421133	ALDH1A3	3	0	0.40888	0.0395516	Increased Methylation
chr16:1921897-1922426	C16orf73	3	0	0.40888	0.0309134	Increased Methylation
chr16:25702955-25704631	HS3ST4	3	0	0.40888	0.00618588	Increased Methylation
chr16:31225956-31228264	PYDC1;TRIM72	3	0	0.40888	0.0285011	Increased Methylation
chr16:55689598-55690895	SLC6A2	3	0	0.40888	0.0490665	Increased Methylation
chr16:66638254-66639561	CMTM3	3	0	0.40888	0.000928453	Increased Methylation
chr16:67196792-67199988	FBXL8;HSF4	3	0	0.40888	0.000877372	Increased Methylation
chr17:32905965-32908951	C17orf102;TMEM132E	3	0	0.40888	0.0121992	Increased Methylation
chr17:62774366-62777797	LOC146880	3	0	0.40888	0.00547428	Increased Methylation
chr17:6679205-6679710	FBXO39	3	0	0.40888	0.00332194	Increased Methylation
chr18:11148307-11149936	FAM38B	3	0	0.40888	0.046596	Increased Methylation
chr18:67067509-67069168	DOK6	3	0	0.40888	0.0101114	Increased Methylation
chr18:70208974-70211790	CBLN2	3	0	0.40888	0.000370311	Increased Methylation
chr19:11785042-11785282	ZNF833	3	0	0.40888	0.00551852	Increased Methylation
chr19:13616752-13617267	CACNA1A	3	0	0.40888	0.00772381	Increased Methylation
chr19:21657569-21658035		3	0	0.40888	0.00751279	Increased Methylation
chr19:22817274-22817546	ZNF492	3	0	0.40888	0.0138388	Increased Methylation
chr19:34112279-34114353	CHST8	3	0	0.40888	0.00306157	Increased Methylation
chr19:37463991-37464606		3	0	0.40888	0.0122511	Increased Methylation
chr19:48945800-48947636	GRIN2D	3	0	0.40888	0.00838936	Increased Methylation
chr19:54024645-54024923	ZNF331	3	0	0.40888	0.0159738	Increased Methylation
chr19:58238585-58239028	ZNF671	3	0	0.40888	0.0174048	Increased Methylation
chr1:967966-970238	AGRN	3	0	0.40888	0.0406621	Increased Methylation
chr20:21686199-21687689	PAX1	3	0	0.40888	0.00882337	Increased Methylation
chr20:37434206-37435592	PPP1R16B	3	0	0.40888	0.00982455	Increased Methylation
chr20:47934839-47935684		3	0	0.40888	0.0389926	Increased Methylation
chr20:49639071-49640212	KCNG1	3	0	0.40888	0.0365192	Increased Methylation
chr20:50721310-50721912	ZFP64	3	0	0.40888	0.0204095	Increased Methylation
chr20:61049361-61051897	GATA5	3	0	0.40888	0.00833594	Increased Methylation
chr20:61636171-61639055	BHLHE23	3	0	0.40888	0.00979332	Increased Methylation
chr2:115419728-115420261	DPP10	3	0	0.40888	0.0101723	Increased Methylation
chr2:120281661-120282211	SCTR	3	0	0.40888	0.0106015	Increased Methylation
chr21:36041305-36043224	CLIC6	3	0	0.40888	0.0166898	Increased Methylation
chr21:38065179-38066185		3	0	0.40888	0.0180872	Increased Methylation
chr2:175594518-175595255		3	0	0.40888	0.0161063	Increased Methylation
chr2:185463208-185463589	ZNF804A	3	0	0.40888	0.00894455	Increased Methylation
chr2:187713846-187714069	ZSWIM2	3	0	0.40888	0.00982329	Increased Methylation
chr2:207506774-207507422	LOC200726	3	0	0.40888	0.0160919	Increased Methylation
chr2:233283397-233285959		3	0	0.40888	0.00250884	Increased Methylation
chr22:33453892-33454505	SYN3	3	0	0.40888	0.00206884	Increased Methylation
chr22:44287497-44288061	PNPLA5	3	0	0.40888	0.003885	Increased Methylation
chr2:45169505-45171884	SIX3	3	0	0.40888	0.0207151	Increased Methylation
chr2:63285949-63287097		3	0	0.40888	0.026155	Increased Methylation
chr2:71017028-71017976	FIGLA	3	0	0.40888	0.021037	Increased Methylation
chr3:128719865-128721245	CCDC48	3	0	0.40888	0.000190775	Increased Methylation
chr3:137489051-137489409		3	0	0.40888	0.0247754	Increased Methylation
chr3:147108511-147111703	ZIC4	3	0	0.40888	0.00674888	Increased Methylation
chr3:147113608-147114479	ZIC4	3	0	0.40888	0.00813117	Increased Methylation
chr3:147130342-147130577	ZIC1	3	0	0.40888	0.00280576	Increased Methylation
chr3:147142181-147142391		3	0	0.40888	0.0259616	Increased Methylation
chr3:172165372-172166738	GHSR	3	0	0.40888	0.0250006	Increased Methylation
chr3:181444409-181445000	SOX2OT	3	0	0.40888	0.00571957	Increased Methylation
chr3:186078710-186080111	DGKG	3	0	0.40888	0.00219434	Increased Methylation
chr3:2140029-2141784		3	0	0.40888	0.0158273	Increased Methylation
chr3:33259919-33260763	SUSD5	3	0	0.40888	0.00187704	Increased Methylation
chr3:35680509-35681628		3	0	0.40888	0.000580745	Increased Methylation
chr3:62362610-62363082		3	0	0.40888	0.00263138	Increased Methylation
chr3:64253533-64253819		3	0	0.40888	0.0100102	Increased Methylation
chr3:96532023-96533625	EPHA6	3	0	0.40888	0.00504915	Increased Methylation
chr4:122301567-122302290	QRFPR	3	0	0.40888	0.00155233	Increased Methylation
chr4:13543562-13546494	NKX3-2	3	0	0.40888	0.0422059	Increased Methylation
chr4:158141404-158141836	GRIA2	3	0	0.40888	0.00743429	Increased Methylation
chr4:172733734-172735118	GALNTL6	3	0	0.40888	0.0432695	Increased Methylation
chr4:174450046-174451469	HAND2;NBLA00301	3	0	0.40888	0.0210627	Increased Methylation
chr4:177713243-177714457	VEGFC	3	0	0.40888	0.00940494	Increased Methylation
chr4:184826253-184828177	STOX2	3	0	0.40888	0.00289537	Increased Methylation
chr4:188916605-188916876	ZFP42	3	0	0.40888	0.00825797	Increased Methylation
chr4:21950538-21950865	KCNIP4	3	0	0.40888	0.0368173	Increased Methylation
chr4:42152766-42154984	BEND4	3	0	0.40888	0.012126	Increased Methylation
chr4:54966163-54968063		3	0	0.40888	0.0130223	Increased Methylation
chr4:5713035-5713451	EVC	3	0	0.40888	0.0101383	Increased Methylation
chr4:93226348-93227007	GRID2	3	0	0.40888	0.0114952	Increased Methylation
chr5:115298350-115299137	LVRN	3	0	0.40888	0.0226371	Increased Methylation
chr5:128300800-128301329	SLC27A6	3	0	0.40888	0.00441458	Increased Methylation
chr5:134374385-134376751		3	0	0.40888	0.0178798	Increased Methylation
chr5:135265848-135266517	FBXL21	3	0	0.40888	0.00254915	Increased Methylation
chr5:146888750-146889840		3	0	0.40888	0.0125387	Increased Methylation
chr5:155107504-155108934		3	0	0.40888	0.0149928	Increased Methylation
chr5:170735169-170739863	TLX3	3	0	0.40888	0.00525928	Increased Methylation
chr5:170741603-170742751		3	0	0.40888	0.0141632	Increased Methylation
chr5:172670829-172671824		3	0	0.40888	0.00194619	Increased Methylation
chr5:172672311-172672971		3	0	0.40888	0.00432541	Increased Methylation
chr5:178770724-178772794	ADAMTS2	3	0	0.40888	0.017522	Increased Methylation
chr5:180017099-180019062	SCGB3A1	3	0	0.40888	0.0111808	Increased Methylation
chr5:1874907-1879032		3	0	0.40888	0.029722	Increased Methylation
chr5:2738953-2741237		3	0	0.40888	0.00368605	Increased Methylation
chr5:54519054-54519628		3	0	0.40888	0.0334738	Increased Methylation
chr5:59189046-59189894	PDE4D	3	0	0.40888	0.00413681	Increased Methylation
chr5:63986189-63986974	FAM159B	3	0	0.40888	0.0159829	Increased Methylation
chr5:76934581-76935296	OTP	3	0	0.40888	0.00741746	Increased Methylation
chr6:10410109-10410690	TFAP2A	3	0	0.40888	0.00772381	Increased Methylation
chr6:133563701-133563905	EYA4	3	0	0.40888	0.0170204	Increased Methylation
chr6:1389139-1391393	FOXF2	3	0	0.40888	0.021283	Increased Methylation
chr6:161188084-161188639		3	0	0.40888	0.00381236	Increased Methylation
chr6:166579973-166583423	T	3	0	0.40888	0.00863176	Increased Methylation
chr6:168079011-168079213		3	0	0.40888	0.00377022	Increased Methylation
chr6:17987415-17988405	KIF13A	3	0	0.40888	0.000564548	Increased Methylation
chr6:41604583-41606663	MDFI	3	0	0.40888	0.00583147	Increased Methylation
chr6:41606994-41607238	MDFI	3	0	0.40888	0.00922105	Increased Methylation
chr6:6002471-6005125	NRN1	3	0	0.40888	0.0129828	Increased Methylation
chr6:87647253-87647707	HTR1E	3	0	0.40888	0.00548458	Increased Methylation
chr7:101005899-101007443	EMID2	3	0	0.40888	0.00770974	Increased Methylation
chr7:103629525-103630652	RELN	3	0	0.40888	0.00619485	Increased Methylation
chr7:145813030-145814084	CNTNAP2	3	0	0.40888	0.00431662	Increased Methylation
chr7:19812569-19813005	TMEM196	3	0	0.40888	0.00184029	Increased Methylation
chr7:30721372-30722445	CRHR2	3	0	0.40888	0.0167798	Increased Methylation
chr7:32337983-32338725		3	0	0.40888	0.0012798	Increased Methylation
chr7:35296921-35298218	TBX20	3	0	0.40888	0.0247252	Increased Methylation
chr7:37487354-37488672	ELMO1	3	0	0.40888	0.00248577	Increased Methylation
chr7:96631383-96631800	DLX6AS	3	0	0.40888	0.0285011	Increased Methylation
chr7:96650221-96651551	DLX5	3	0	0.40888	0.0140754	Increased Methylation
chr8:101117922-101118693	RGS22	3	0	0.40888	0.00348654	Increased Methylation
chr8:105478672-105479340	DPYS	3	0	0.40888	0.00115429	Increased Methylation
chr8:11559596-11562956		3	0	0.40888	0.0212712	Increased Methylation
chr8:31496525-31498346	NRG1	3	0	0.40888	0.0094094	Increased Methylation
chr8:32405407-32406901	NRG1	3	0	0.40888	0.00685046	Increased Methylation
chr8:35092679-35093559	UNC5D	3	0	0.40888	0.0197777	Increased Methylation
chr8:41753340-41755250	ANK1	3	0	0.40888	0.0367678	Increased Methylation
chr8:49647702-49647988	EFCAB1	3	0	0.40888	0.00932888	Increased Methylation
chr8:54789581-54790665	RGS20	3	0	0.40888	0.00248011	Increased Methylation
chr8:55366180-55367628		3	0	0.40888	0.00559777	Increased Methylation
chr8:55370170-55372525	SOX17	3	0	0.40888	0.0196001	Increased Methylation
chr8:57069687-57070047		3	0	0.40888	0.0126782	Increased Methylation
chr8:6424215-6424888	MCPH1;ANGPT2	3	0	0.40888	0.0231266	Increased Methylation
chr8:65281903-65283043		3	0	0.40888	0.0122131	Increased Methylation
chr8:65286067-65286659		3	0	0.40888	0.0169067	Increased Methylation
chr8:65290108-65290946	MIR124-2	3	0	0.40888	0.0285011	Increased Methylation
chr8:686830-689496		3	0	0.40888	0.00484369	Increased Methylation
chr8:97172634-97173880	GDF6	3	0	0.40888	0.0101114	Increased Methylation
chr9:132382432-132383004	C9orf50	3	0	0.40888	0.00244448	Increased Methylation
chrX:107978210-107980145	IRS4	3	0	0.40888	0.00982455	Increased Methylation
chrX:113816089-113816409		3	0	0.40888	0.00314687	Increased Methylation
chrX:51075272-51076331	NUDT10	3	0	0.40888	0.0114394	Increased Methylation
chr10:102896342-102896665	TLX1	4	0	0.40888	0.000878549	Increased Methylation
chr10:102899177-102899489		4	0	0.40888	0.000440357	Increased Methylation
chr10:105036628-105038084	INA	4	0	0.40888	0.00019804	Increased Methylation
chr10:119301321-119305368	EMX2OS;EMX2	4	0	0.40888	0.000376678	Increased Methylation
chr10:23983366-23984978	KIAA1217	4	0	0.40888	0.00199624	Increased Methylation
chr10:57390343-57391215		4	0	0.40888	0.00010582	Increased Methylation
chr10:8091374-8098329	FLJ45983	4	0	0.40888	0.000612201	Increased Methylation
chr10:82116202-82117120	DYDC2;DYDC1	4	0	0.40888	0.00863176	Increased Methylation
chr10:91294947-91295925	SLC16A12	4	0	0.40888	0.00206203	Increased Methylation
chr11:111383168-111383892	MIR34C;MIR34B;BTG4	4	0	0.40888	0.00266497	Increased Methylation
chr1:119531991-119532196	TBX15	4	0	0.40888	0.00161654	Increased Methylation
chr11:27743472-27744564	BDNF	4	0	0.40888	0.000415684	Increased Methylation
chr11:636906-640628	DRD4	4	0	0.40888	0.00198769	Increased Methylation
chr11:63766058-63768666	MACROD1	4	0	0.40888	0.00147739	Increased Methylation
chr1:200010625-200010832	NR5A2	4	0	0.40888	0.00181788	Increased Methylation
chr1:207818389-207818952	CR1L	4	0	0.40888	0.00201785	Increased Methylation
chr12:115124729-115125152		4	0	0.40888	0.000985974	Increased Methylation
chr1:217310749-217311178	ESRRG	4	0	0.40888	0.000521738	Increased Methylation
chr1:237205126-237206644	RYR2	4	0	0.40888	0.00364604	Increased Methylation
chr12:4918273-4919657	KCNA6	4	0	0.40888	0.000912466	Increased Methylation
chr1:25255527-25259005	RUNX3	4	0	0.40888	0.00104583	Increased Methylation
chr12:85306282-85306829	SLC6A15	4	0	0.40888	0.000726613	Increased Methylation
chr13:100620241-100624348	ZIC5	4	0	0.40888	0.00128741	Increased Methylation
chr13:102568425-102569495	FGF14	4	0	0.40888	0.00100045	Increased Methylation
chr13:108519292-108521063	FAM155A	4	0	0.40888	0.00141014	Increased Methylation
chr13:112709884-112712665		4	0	0.40888	0.00208662	Increased Methylation
chr13:112760865-112761113		4	0	0.40888	0.000121128	Increased Methylation
chr1:33219427-33220028	KIAA1522	4	0	0.40888	0.00187137	Increased Methylation
chr13:88323569-88324640	SLITRK5	4	0	0.40888	0.000181091	Increased Methylation
chr13:96204691-96205496	CLDN10	4	0	0.40888	0.000660884	Increased Methylation
chr14:24779874-24780932	LTB4R;CIDEB;LTB4R2	4	0	0.40888	0.000784942	Increased Methylation
chr14:42075858-42076329	LRFN5	4	0	0.40888	0.000253	Increased Methylation
chr1:44871109-44874047	RNF220	4	0	0.40888	0.000529889	Increased Methylation
chr14:58331676-58333121		4	0	0.40888	0.000390647	Increased Methylation
chr14:60951976-60952946	C14orf39	4	0	0.40888	0.00288041	Increased Methylation
chr14:60975732-60978180	SIX6	4	0	0.40888	0.000151659	Increased Methylation
chr14:74706188-74708192	VSX2	4	0	0.40888	0.000423688	Increased Methylation
chr1:47899661-47900385	MGC12982	4	0	0.40888	0.000941697	Increased Methylation
chr15:48936810-48938577	FBN1	4	0	0.40888	0.00100082	Increased Methylation
chr16:54970301-54972846		4	0	0.40888	0.00393445	Increased Methylation
chr16:86599355-86602649	FOXC2	4	0	0.40888	0.00177642	Increased Methylation
chr17:6616422-6617471	SLC13A5	4	0	0.40888	0.0013627	Increased Methylation
chr18:55103154-55108853	ONECUT2	4	0	0.40888	0.000315922	Increased Methylation
chr18:74961556-74963822	GALR1	4	0	0.40888	0.00219434	Increased Methylation
chr18:904578-909574	ADCYAP1	4	0	0.40888	2.06339e-05	Increased Methylation
chr1:91183240-91184540	BARHL2	4	0	0.40888	0.000370311	Increased Methylation
chr1:91185156-91185577		4	0	0.40888	0.00104932	Increased Methylation
chr19:15344091-15344419	EPHX3	4	0	0.40888	0.00080337	Increased Methylation
chr19:15580382-15580863	PGLYRP2	4	0	0.40888	0.00354028	Increased Methylation
chr19:21646328-21646536		4	0	0.40888	0.000377446	Increased Methylation
chr19:56988313-56989741	ZNF667	4	0	0.40888	0.00288039	Increased Methylation
chr19:58399945-58400276	ZNF814	4	0	0.40888	0.000746286	Increased Methylation
chr19:58446336-58446800	ZNF418	4	0	0.40888	0.00078809	Increased Methylation
chr1:98510966-98511710		4	0	0.40888	0.00108772	Increased Methylation
chr20:24449844-24452037	TMEM90B	4	0	0.40888	0.000455268	Increased Methylation
chr20:39316550-39319987	MAFB	4	0	0.40888	0.00461761	Increased Methylation
chr20:53091733-53092993	DOK5	4	0	0.40888	0.00239445	Increased Methylation
chr20:59826977-59828978	CDH4	4	0	0.40888	0.0003336	Increased Methylation
chr2:119602616-119604486	EN1	4	0	0.40888	0.00819512	Increased Methylation
chr2:145273456-145275378	ZEB2	4	0	0.40888	0.00351995	Increased Methylation
chr2:154727906-154728271	GALNT13	4	0	0.40888	0.00361241	Increased Methylation
chr2:154728944-154729328	GALNT13	4	0	0.40888	0.00118984	Increased Methylation
chr22:19136293-19138512	GSC2	4	0	0.40888	0.000226778	Increased Methylation
chr22:48970857-48972947	FAM19A5	4	0	0.40888	0.00104583	Increased Methylation
chr2:29337983-29338909	CLIP4	4	0	0.40888	0.000463402	Increased Methylation
chr2:38301276-38304518	CYP1B1	4	0	0.40888	0.00306807	Increased Methylation
chr2:40678477-40678717	SLC8A1	4	0	0.40888	7.40959e-05	Increased Methylation
chr2:45155195-45157049		4	0	0.40888	0.000963295	Increased Methylation
chr2:45161427-45163058		4	0	0.40888	0.00136682	Increased Methylation
chr2:5836068-5837643	SOX11	4	0	0.40888	0.00282774	Increased Methylation
chr2:63282514-63283122	OTX1	4	0	0.40888	0.0079214	Increased Methylation
chr2:74740455-74743795	TLX2	4	0	0.40888	0.000439947	Increased Methylation
chr3:126113547-126113967	CCDC37	4	0	0.40888	7.40959e-05	Increased Methylation
chr3:142837885-142840838	CHST2	4	0	0.40888	0.00089618	Increased Methylation
chr3:181430141-181431076	SOX2;SOX2OT	4	0	0.40888	0.00019804	Increased Methylation
chr3:185911344-185912228	DGKG	4	0	0.40888	0.00141568	Increased Methylation
chr3:238391-240140	CHL1	4	0	0.40888	0.00281083	Increased Methylation
chr3:27765196-27765675	EOMES	4	0	0.40888	0.000250965	Increased Methylation
chr3:69591011-69592050		4	0	0.40888	0.00320176	Increased Methylation
chr4:111539228-111539483		4	0	0.40888	0.00246384	Increased Methylation
chr4:126235895-126238930	FAT4	4	0	0.40888	0.00080337	Increased Methylation
chr4:144620822-144622218	FREM3	4	0	0.40888	1.22337e-06	Increased Methylation
chr4:155663809-155664315		4	0	0.40888	0.000133736	Increased Methylation
chr4:166794545-166795341	TLL1	4	0	0.40888	0.00115429	Increased Methylation
chr4:30721204-30724842	PCDH7	4	0	0.40888	0.00152005	Increased Methylation
chr4:40858884-40859162	APBB2	4	0	0.40888	4.31571e-05	Increased Methylation
chr4:41883492-41884570		4	0	0.40888	0.00080895	Increased Methylation
chr4:5053230-5054092	STK32B	4	0	0.40888	0.000230904	Increased Methylation
chr4:55991402-55992171	KDR	4	0	0.40888	0.00121299	Increased Methylation
chr4:62065883-62068801		4	0	0.40888	0.00432541	Increased Methylation
chr4:66535193-66535620	EPHA5	4	0	0.40888	0.000877372	Increased Methylation
chr4:96469859-96470994	UNC5C	4	0	0.40888	0.000371764	Increased Methylation
chr5:134363092-134365146		4	0	0.40888	0.00504915	Increased Methylation
chr5:174158680-174159729		4	0	0.40888	0.000567409	Increased Methylation
chr5:178367620-178368725	ZNF454	4	0	0.40888	0.00141014	Increased Methylation
chr5:63256548-63257886	HTR1A	4	0	0.40888	0.00201515	Increased Methylation
chr6:152128822-152129771	ESR1	4	0	0.40888	0.000567409	Increased Methylation
chr6:33048416-33048814	HLA-DPB1	4	0	0.40888	0.00120004	Increased Methylation
chr6:33943604-33944027		4	0	0.40888	0.0012512	Increased Methylation
chr6:85482569-85484718		4	0	0.40888	0.00347481	Increased Methylation
chr7:116962841-116964803	WNT2	4	0	0.40888	0.00272877	Increased Methylation
chr7:121940006-121940648		4	0	0.40888	0.00252325	Increased Methylation
chr7:143582125-143582610	FAM115A	4	0	0.40888	5.51973e-05	Increased Methylation
chr7:151106244-151107808	WDR86	4	0	0.40888	0.000485307	Increased Methylation
chr7:71800757-71802768	CALN1	4	0	0.40888	0.000466692	Increased Methylation
chr7:84814839-84816242		4	0	0.40888	0.00969885	Increased Methylation
chr7:8481974-8482762	NXPH1	4	0	0.40888	0.000163752	Increased Methylation
chr7:96645786-96646599	DLX6AS	4	0	0.40888	0.000877372	Increased Methylation
chr8:15397636-15398287	TUSC3	4	0	0.40888	0.00185682	Increased Methylation
chr8:23567180-23567678		4	0	0.40888	0.000139894	Increased Methylation
chr8:26721642-26724566	ADRA1A	4	0	0.40888	0.00751279	Increased Methylation
chr8:41165852-41167140	SFRP1	4	0	0.40888	0.00377014	Increased Methylation
chr8:54163303-54164443	OPRK1	4	0	0.40888	0.00409092	Increased Methylation
chr8:67873388-67875600		4	0	0.40888	0.00306608	Increased Methylation
chr8:77594255-77594860	LOC100192378;ZFHX4	4	0	0.40888	0.00186517	Increased Methylation
chr8:9760750-9761643	LOC157627	4	0	0.40888	8.4361e-05	Increased Methylation
chr9:122131086-122132214	DBC1	4	0	0.40888	0.00328914	Increased Methylation
chr9:133534534-133542394		4	0	0.40888	0.0017815	Increased Methylation
chrX:101906001-101907017	GPRASP1	4	0	0.40888	0.000825186	Increased Methylation
chrX:124338904-124339940		4	0	0.40888	0.000393196	Increased Methylation
chrX:133305678-133306936		4	0	0.40888	0.0012512	Increased Methylation
chrX:142721410-142722958	SLITRK4	4	0	0.40888	0.00102783	Increased Methylation
chrX:6144120-6145906	NLGN4X	4	0	0.40888	0.00182432	Increased Methylation
chr10:100993820-100994188	HPSE2	5	0	0.40888	7.67151e-06	Increased Methylation
chr10:131761169-131771696		5	0	0.40888	1.05502e-05	Increased Methylation
chr10:15761423-15762101	ITGA8	5	0	0.40888	5.18979e-06	Increased Methylation
chr10:50817601-50820356	SLC18A3;CHAT	5	0	0.40888	0.000462291	Increased Methylation
chr11:111410932-111412199	LAYN	5	0	0.40888	6.08612e-05	Increased Methylation
chr11:131780328-131781532	NTM	5	0	0.40888	8.56091e-05	Increased Methylation
chr11:43602545-43603215	MIR129-2	5	0	0.40888	0.000230904	Increased Methylation
chr1:14924610-14925993	KIAA1026	5	0	0.40888	8.56847e-06	Increased Methylation
chr11:506353-508009	RNH1	5	0	0.40888	2.8085e-05	Increased Methylation
chr1:1564421-1570006	MIB2	5	0	0.40888	6.08374e-05	Increased Methylation
chr1:16085147-16085862	FBLIM1	5	0	0.40888	0.00010582	Increased Methylation
chr1:169396621-169396869	C1orf114	5	0	0.40888	4.50066e-05	Increased Methylation
chr1:18956895-18959829	PAX7	5	0	0.40888	4.4752e-05	Increased Methylation
chr1:200004474-200004933	NR5A2	5	0	0.40888	0.000233084	Increased Methylation
chr12:117798076-117799448	NOS1	5	0	0.40888	0.000441153	Increased Methylation
chr12:128751041-128753151	TMEM132C	5	0	0.40888	0.000895274	Increased Methylation
chr1:229567206-229570684	ACTA1	5	0	0.40888	0.000259779	Increased Methylation
chr12:64061836-64062774	DPY19L2	5	0	0.40888	7.99805e-06	Increased Methylation
chr13:23733808-23734816		5	0	0.40888	0.00144605	Increased Methylation
chr13:36871667-36872059	C13orf38	5	0	0.40888	3.17956e-05	Increased Methylation
chr13:79170114-79171231		5	0	0.40888	0.000135145	Increased Methylation
chr13:93879245-93880877	GPC6	5	0	0.40888	6.64895e-05	Increased Methylation
chr14:100437381-100438863		5	0	0.40888	0.00100045	Increased Methylation
chr14:29236835-29237832	FOXG1	5	0	0.40888	8.60361e-05	Increased Methylation
chr14:85996494-85996958	FLRT2	5	0	0.40888	2.75383e-05	Increased Methylation
chr1:50513644-50514320	ELAVL4	5	0	0.40888	2.2157e-05	Increased Methylation
chr16:22824616-22826459	HS3ST2	5	0	0.40888	0.000179234	Increased Methylation
chr16:56224731-56224980	DKFZP434H168;GNAO1	5	0	0.40888	2.20003e-07	Increased Methylation
chr17:50235175-50236466	CA10	5	0	0.40888	1.19199e-05	Increased Methylation
chr18:11750953-11752756	GNAL	5	0	0.40888	3.85742e-05	Increased Methylation
chr18:49868377-49868759	DCC	5	0	0.40888	0.000283422	Increased Methylation
chr18:7116852-7118241	LAMA1	5	0	0.40888	0.000246579	Increased Methylation
chr1:91300979-91301891		5	0	0.40888	3.53519e-05	Increased Methylation
chr19:18539781-18540341	SSBP4	5	0	0.40888	3.79779e-07	Increased Methylation
chr19:53757819-53758148	ZNF677	5	0	0.40888	0.000206687	Increased Methylation
chr19:58570393-58571779	ZNF135	5	0	0.40888	0.000487785	Increased Methylation
chr1:99469932-99470968	LPPR5	5	0	0.40888	0.000536836	Increased Methylation
chr20:45142000-45142337	ZNF334	5	0	0.40888	9.35397e-05	Increased Methylation
chr2:100937779-100939059	LONRF2	5	0	0.40888	3.17956e-05	Increased Methylation
chr2:108602824-108603467	SLC5A7	5	0	0.40888	0.00101033	Increased Methylation
chr2:115918737-115920765	DPP10	5	0	0.40888	2.76491e-07	Increased Methylation
chr21:34395128-34400245	OLIG2	5	0	0.40888	0.000140511	Increased Methylation
chr2:144694666-144695180		5	0	0.40888	0.000580745	Increased Methylation
chr2:164592917-164593511	FIGN	5	0	0.40888	0.000293313	Increased Methylation
chr2:1746833-1748971	PXDN	5	0	0.40888	0.00038114	Increased Methylation
chr2:98962873-98964187	CNGA3	5	0	0.40888	0.000259779	Increased Methylation
chr3:128205495-128212274	GATA2	5	0	0.40888	0.000246579	Increased Methylation
chr3:184301117-184302134		5	0	0.40888	0.00116399	Increased Methylation
chr3:26664104-26664796	LRRC3B	5	0	0.40888	0.000107882	Increased Methylation
chr4:107956555-107957453	DKK2	5	0	0.40888	1.09855e-05	Increased Methylation
chr4:111549879-111550203	PITX2	5	0	0.40888	0.000376678	Increased Methylation
chr4:111554965-111555504	PITX2	5	0	0.40888	4.54518e-05	Increased Methylation
chr4:122685860-122686565	LOC100192379;TMEM155	5	0	0.40888	3.64669e-05	Increased Methylation
chr4:156680095-156681386	GUCY1B3	5	0	0.40888	0.000246579	Increased Methylation
chr4:157997166-157997686	GLRB	5	0	0.40888	0.000178305	Increased Methylation
chr4:17782642-17783624	FAM184B	5	0	0.40888	2.34483e-05	Increased Methylation
chr4:4859632-4860191		5	0	0.40888	0.000877372	Increased Methylation
chr4:778661-780592	CPLX1	5	0	0.40888	9.27727e-05	Increased Methylation
chr5:136834016-136835146	SPOCK1	5	0	0.40888	0.000415684	Increased Methylation
chr5:37836747-37840726	GDNF	5	0	0.40888	0.000228936	Increased Methylation
chr5:5139441-5140941	ADAMTS16	5	0	0.40888	0.000280409	Increased Methylation
chr6:108485671-108490539	NR2E1	5	0	0.40888	0.000332789	Increased Methylation
chr6:29795553-29796594	HLA-G	5	0	0.40888	1.76737e-05	Increased Methylation
chr6:85472702-85474132	TBX18	5	0	0.40888	0.00037946	Increased Methylation
chr6:99272394-99273014		5	0	0.40888	0.000877372	Increased Methylation
chr7:136553854-136556194	CHRM2	5	0	0.40888	0.000119793	Increased Methylation
chr7:45960137-45961347	IGFBP3	5	0	0.40888	9.94852e-05	Increased Methylation
chr8:104510870-104513913	RIMS2	5	0	0.40888	0.000299756	Increased Methylation
chr8:143531118-143534495		5	0	0.40888	0.00306157	Increased Methylation
chr8:17270603-17271120	MTMR7	5	0	0.40888	0.000737542	Increased Methylation
chr8:55378928-55380186		5	0	0.40888	0.000133736	Increased Methylation
chr8:99960497-99961438	OSR2	5	0	0.40888	8.03712e-05	Increased Methylation
chr9:124461797-124462190	DAB2IP	5	0	0.40888	0.000230904	Increased Methylation
chrX:103498706-103499843	ESX1	5	0	0.40888	5.03723e-06	Increased Methylation
chr10:106399567-106402812	SORCS3	6	0	0.40888	2.66274e-05	Increased Methylation
chr10:129534410-129537366	FOXI2	6	0	0.40888	0.0437298	Increased Methylation
chr10:28030182-28035211	MKX	6	0	0.40888	6.70145e-08	Increased Methylation
chr11:101453357-101454684	TRPC6	6	0	0.40888	8.70764e-05	Increased Methylation
chr1:119526782-119527192	TBX15	6	0	0.40888	2.91321e-05	Increased Methylation
chr1:119549144-119551320		6	0	0.40888	1.5932e-06	Increased Methylation
chr13:102068116-102069258	NALCN	6	0	0.40888	5.45848e-05	Increased Methylation
chr13:26624725-26626265	SHISA2	6	0	0.40888	1.22337e-06	Increased Methylation
chr13:36705040-36705707	DCLK1	6	0	0.40888	1.23588e-06	Increased Methylation
chr1:47909712-47911020		6	0	0.40888	9.47867e-06	Increased Methylation
chr15:28351606-28353102		6	0	0.40888	2.84795e-07	Increased Methylation
chr1:57887963-57890637	DAB1	6	0	0.40888	6.10124e-06	Increased Methylation
chr15:83775861-83776922	TM6SF1	6	0	0.40888	0.000352366	Increased Methylation
chr18:12254147-12255089	CIDEA	6	0	0.40888	7.85087e-06	Increased Methylation
chr18:76737005-76741244	SALL3	6	0	0.40888	3.29296e-06	Increased Methylation
chr19:56879417-56879995	ZNF542	6	0	0.40888	6.07421e-06	Increased Methylation
chr20:23028403-23032218	THBD	6	0	0.40888	2.52237e-07	Increased Methylation
chr20:37352130-37357372	SLC32A1	6	0	0.40888	3.13945e-06	Increased Methylation
chr2:105459127-105461770		6	0	0.40888	6.42357e-05	Increased Methylation
chr2:119914126-119916663	C1QL2	6	0	0.40888	6.14357e-06	Increased Methylation
chr2:131720819-131721867	ARHGEF4	6	0	0.40888	3.16778e-06	Increased Methylation
chr21:38068193-38073891		6	0	0.40888	6.60759e-06	Increased Methylation
chr2:198649751-198651599	BOLL	6	0	0.40888	3.44856e-06	Increased Methylation
chr2:68546339-68547111	CNRIP1	6	0	0.40888	1.60193e-06	Increased Methylation
chr3:129693127-129694841	TRH	6	0	0.40888	7.1874e-05	Increased Methylation
chr3:62357639-62359774	FEZF2	6	0	0.40888	2.76491e-07	Increased Methylation
chr4:110222970-110224257	COL25A1	6	0	0.40888	0.0445365	Increased Methylation
chr4:1396291-1401730		6	0	0.40888	6.67121e-05	Increased Methylation
chr4:20253276-20256868	SLIT2	6	0	0.40888	1.80498e-05	Increased Methylation
chr5:168727429-168728275	SLIT3	6	0	0.40888	1.12733e-07	Increased Methylation
chr5:1881924-1887743	IRX4	6	0	0.40888	6.16701e-05	Increased Methylation
chr5:2748368-2757024	IRX2	6	0	0.40888	2.65612e-05	Increased Methylation
chr6:166073882-166077752	PDE10A	6	0	0.40888	9.96602e-06	Increased Methylation
chr6:72129508-72130756	C6orf155	6	0	0.40888	4.77639e-06	Increased Methylation
chr7:152622343-152623305		6	0	0.40888	7.67151e-06	Increased Methylation
chr7:38670439-38671008	AMPH	6	0	0.40888	2.06206e-07	Increased Methylation
chr7:79082948-79083850	MAGI2	6	0	0.40888	2.04361e-06	Increased Methylation
chrX:21391835-21393408	CNKSR2	6	0	0.40888	4.46576e-05	Increased Methylation
chrX:30326439-30327668	NR0B1	6	0	0.40888	1.12929e-06	Increased Methylation
chr10:23462224-23463889		7	0	0.40888	4.86969e-07	Increased Methylation
chr10:7449376-7455339	SFMBT2	7	0	0.40888	1.101e-06	Increased Methylation
chr1:111216244-111217937	KCNA3	7	0	0.40888	1.24551e-07	Increased Methylation
chr11:2158951-2162484	IGF2;IGF2AS;INS-IGF2	7	0	0.40888	7.99805e-06	Increased Methylation
chr11:31820060-31821416	PAX6	7	0	0.40888	1.92479e-06	Increased Methylation
chr12:115135925-115136350		7	0	0.40888	3.44856e-06	Increased Methylation
chr12:81471569-81472119	ACSS3	7	0	0.40888	2.03394e-06	Increased Methylation
chr13:112758598-112760491		7	0	0.40888	1.22337e-06	Increased Methylation
chr13:28501859-28502090		7	0	0.40888	2.78112e-06	Increased Methylation
chr13:37005581-37006453	CCNA1	7	0	0.40888	1.24551e-07	Increased Methylation
chr13:95363152-95366051	SOX21	7	0	0.40888	2.70834e-06	Increased Methylation
chr14:38067446-38069207		7	0	0.40888	2.78112e-06	Increased Methylation
chr1:50884228-50891471	DMRTA2	7	0	0.40888	3.13945e-06	Increased Methylation
chr15:68115485-68122575	LBXCOR1	7	0	0.40888	1.76737e-05	Increased Methylation
chr1:77333111-77334534	ST6GALNAC5	7	0	0.40888	2.35033e-07	Increased Methylation
chr1:91190489-91192804		7	0	0.40888	1.31128e-06	Increased Methylation
chr20:41817475-41819212	PTPRT	7	0	0.40888	5.69208e-07	Increased Methylation
chr21:28337856-28340237	ADAMTS5	7	0	0.40888	0.0282575	Increased Methylation
chr3:132756985-132757895	TMEM108	7	0	0.40888	9.39934e-08	Increased Methylation
chr3:68980783-68982035	FAM19A4	7	0	0.40888	1.84805e-07	Increased Methylation
chr4:111532647-111533391		7	0	0.40888	5.4472e-06	Increased Methylation
chr4:111560563-111560808	PITX2	7	0	0.40888	6.49266e-05	Increased Methylation
chr5:127872563-127874945	FBN2	7	0	0.40888	5.68481e-08	Increased Methylation
chr5:134366913-134367438	PITX1	7	0	0.40888	3.90985e-06	Increased Methylation
chr5:87976094-87976546	LOC645323	7	0	0.40888	1.69515e-07	Increased Methylation
chr6:29759946-29760903	HCG4	7	0	0.40888	6.53074e-07	Increased Methylation
chr6:73330942-73333109	KCNQ5	7	0	0.40888	4.38817e-06	Increased Methylation
chr7:142494563-142495248		7	0	0.40888	0.020197	Increased Methylation
chr7:157476886-157486719	PTPRN2	7	0	0.40888	1.14033e-05	Increased Methylation
chr8:109094485-109095849	RSPO2	7	0	0.40888	5.75603e-06	Increased Methylation
chr8:132052203-132054749	ADCY8	7	0	0.40888	0.0238066	Increased Methylation
chr8:72468560-72469561		7	0	0.40888	5.03723e-06	Increased Methylation
chr10:26504383-26507434	GAD2	8	0	0.40888	0.017703	Increased Methylation
chr1:119529819-119530712	TBX15	8	0	0.40888	3.09812e-07	Increased Methylation
chr12:72665683-72667551	TRHDE;LOC283392	8	0	0.40888	6.60109e-09	Increased Methylation
chr13:110958891-110960590	COL4A2;COL4A1	8	0	0.40888	1.29535e-08	Increased Methylation
chr13:36919737-36921004	SPG20	8	0	0.40888	0.0023749	Increased Methylation
chr17:43339124-43339832	LOC100133991;C17orf46	8	0	0.40888	5.68481e-08	Increased Methylation
chr20:21485932-21496714		8	0	0.40888	3.05499e-07	Increased Methylation
chr21:38076762-38077685	SIM2	8	0	0.40888	3.44545e-07	Increased Methylation
chr2:139537692-139538650	NXPH2	8	0	0.40888	1.38528e-08	Increased Methylation
chr2:182321761-182323029	ITGA4	8	0	0.40888	0.00833594	Increased Methylation
chr4:134069162-134070442		8	0	0.40888	1.75154e-09	Increased Methylation
chr5:115151348-115152713	CDO1	8	0	0.40888	3.00868e-08	Increased Methylation
chr6:84417597-84419378	SNAP91	8	0	0.40888	1.1723e-06	Increased Methylation
chr7:1269165-1282864		8	0	0.40888	5.55707e-08	Increased Methylation
chr7:158936507-158938492	VIPR2	8	0	0.40888	2.47504e-06	Increased Methylation
chr8:68864584-68864946	PREX2	8	0	0.40888	0.0109663	Increased Methylation
chr8:69242920-69243803		8	0	0.40888	2.07445e-07	Increased Methylation
chr8:70981873-70984888	PRDM14	8	0	0.40888	1.74306e-08	Increased Methylation
chr11:128562671-128565011	FLI1	9	0	0.40888	0.000842408	Increased Methylation
chr11:20690579-20691845	NELL1	9	0	0.40888	1.91178e-08	Increased Methylation
chr12:104697348-104697984	TXNRD1;EID3	9	0	0.40888	3.41022e-07	Increased Methylation
chr20:25061761-25062928	VSX1	9	0	0.40888	1.29535e-08	Increased Methylation
chr20:61806254-61810867	MIR124-3	9	0	0.40888	1.00702e-07	Increased Methylation
chr4:111553079-111554210	PITX2	9	0	0.40888	1.74306e-08	Increased Methylation
chr5:140864527-140864748	PCDHGB5;PCDHGA10;PCDHGB4;PCDHGB1;PCDHGB2;PCDHGA2;PCDHGA12;PCDHGA8;PCDHGA9;PCDHGB3;PCDHGC3;PCDHGA6;PCDHGA11;PCDHGB6;PCDHGA5;PCDHGC4;PCDHGA1;PCDHGA4;PCDHGA3;PCDHGB7;PCDHGA7	9	0	0.40888	6.57667e-08	Increased Methylation
chr5:16179064-16180420	MARCH11	9	0	0.40888	2.72595e-07	Increased Methylation
chr6:100912071-100913337	SIM1	9	0	0.40888	2.53057e-08	Increased Methylation
chr7:93519366-93520184	TFPI2	9	0	0.40888	3.03024e-09	Increased Methylation
chr8:145103285-145108027		9	0	0.40888	1.71253e-09	Increased Methylation
chr8:67344497-67344989	ADHFE1	9	0	0.40888	4.75233e-11	Increased Methylation
chr8:85096759-85097247	RALYL	9	0	0.40888	6.92281e-07	Increased Methylation
chr11:105481126-105481422	GRIA4	10	0	0.40888	8.33892e-09	Increased Methylation
chr15:83951980-83953930	BNC1	10	0	0.40888	1.08639e-09	Increased Methylation
chr16:66612749-66613412	CMTM1;CMTM2	10	0	0.40888	2.54353e-09	Increased Methylation
chr6:32063533-32065044	TNXB	10	0	0.40888	2.57954e-10	Increased Methylation
chr6:391188-393790	IRF4	10	0	0.40888	8.09244e-10	Increased Methylation
chr6:62995855-62996228	KHDRBS2	10	0	0.40888	5.52599e-10	Increased Methylation
chr7:24323558-24325080	NPY	10	0	0.40888	2.3348e-09	Increased Methylation
chr7:27143181-27143479	HOXA2	10	0	0.40888	5.05656e-11	Increased Methylation
chr8:53851701-53854426	NPBWR1	10	0	0.40888	5.845e-10	Increased Methylation
chr7:27182613-27185562	HOXA5	11	0	0.40888	1.28643e-10	Increased Methylation
chr10:102893660-102895059	TLX1;TLX1NB	12	0	0.40888	5.57269e-10	Increased Methylation
chr10:118030732-118034230	GFRA1	12	0	0.40888	1.13388e-10	Increased Methylation
chr13:28498226-28499046	PDX1	12	0	0.40888	4.31736e-12	Increased Methylation
chr3:192125821-192127994	FGF12	12	0	0.40888	3.5728e-13	Increased Methylation
chr4:154709512-154710827	SFRP2	12	0	0.40888	2.7316e-12	Increased Methylation
chr7:19156050-19158042	TWIST1	12	0	0.40888	2.59403e-11	Increased Methylation
chr21:38079941-38081833	SIM2	13	0	0.40888	4.76518e-13	Increased Methylation
chr8:72755783-72756667	MSC	13	0	0.40888	4.75233e-11	Increased Methylation
chr16:51183699-51188763	SALL1	15	0	0.40888	1.29974e-12	Increased Methylation
chr13:78492425-78493382	EDNRB	17	0	0.40888	3.62142e-17	Increased Methylation
chr6:133562086-133563586	EYA4	22	0	0.40888	2.93064e-22	Increased Methylation
chr6:29521110-29521833		25	0	0.40888	5.04467e-26	Increased Methylation
